# Supplementary material for: Developments in Mannose‐Based Treatments for Uropathogenic Escherichia coli‐Induced Urinary Tract Infections
Source: PubMed Central journal article supplement (PMC7894189; doi:10.1002/cbic.202000406), 2020-11-02
Supplement: CBIC-22-613-s001.pdf [file CBIC-22-613-s001.pdf]

## **Author Contributions**

N.H. Writing – original draft:Lead; Writing – review & editing:Lead

C.B. Supervision:Lead; Writing – review & editing:Lead

M.F. Writing – original draft:Supporting; Writing – review & editing:Lead
